# Supplementary material for: Association of Patient Profile with Glycemic Control and Hypoglycemia with Insulin Glargine 300 U/mL in Type 2 Diabetes: A Post Hoc Patient-Level Meta-Analysis
Source: Springer Nature journal article supplement (doi:10.1007/s13300-018-0498-x), 2018-09-10
Supplement: MOESM1 [file 16110876]

## Supplementary materials

Supplementary Table S1: Insulin dose at baseline and month 6 in the modified intent-to-treat (mITT) population (pooled data from EDITION 1, 2 and 3)

|                             |                       | Baseline insulin dose<br>(U/kg/day) |             | Insulin dose at month 6<br>(U/kg/day) |             | Change from baseline to month 6<br>(U/kg/day) |             |
|-----------------------------|-----------------------|-------------------------------------|-------------|---------------------------------------|-------------|-----------------------------------------------|-------------|
|                             |                       | Gla-300                             | Gla-100     | Gla-300                               | Gla-100     | Gla-300                                       | Gla-100     |
|                             |                       | n=912                               | n=902       | n=792                                 | n=778       | n=792                                         | n=778       |
| Age                         | <65 years             | 0.50 ± 0.31                         | 0.50 ± 0.31 | 0.86 ± 0.37                           | 0.77 ± 0.32 | 0.36 ± 0.26                                   | 0.26 ± 0.23 |
|                             |                       | n=323                               | n=329       | n=280                                 | n=277       | n=280                                         | n=277       |
|                             | ≥65 years             | 0.49 ± 0.30                         | 0.50 ± 0.28 | 0.80 ± 0.35                           | 0.73 ± 0.32 | 0.31 ± 0.23                                   | 0.23 ± 0.21 |
| BMI                         | <30 kg/m <sup>2</sup> | 0.44 ± 0.31                         | 0.44 ± 0.30 | 0.78 ± 0.37                           | 0.69 ± 0.35 | 0.33 ± 0.26                                   | 0.24 ± 0.25 |
|                             |                       | n=909                               | n=941       | n=788                                 | n=803       | n=788                                         | n=803       |
|                             | ≥30 kg/m <sup>2</sup> | 0.51 ± 0.30                         | 0.52 ± 0.31 | 0.87 ± 0.36                           | 0.78 ± 0.31 | 0.35 ± 0.25                                   | 0.25 ± 0.22 |
| Age at onset of<br>diabetes | <40 years             | 0.55 ± 0.34                         | 0.54 ± 0.33 | 0.92 ± 0.42                           | 0.79 ± 0.31 | 0.35 ± 0.25                                   | 0.25 ± 0.24 |
|                             |                       | n=314                               | n=302       | n=263                                 | n=259       | n=263                                         | n=259       |
|                             | 40–50 years           | 0.51 ± 0.30                         | 0.52 ± 0.30 | 0.86 ± 0.34                           | 0.77 ± 0.33 | 0.35 ± 0.25                                   | 0.24 ± 0.24 |
|                             |                       | n=455                               | n=493       | n=396                                 | n=432       | n=396                                         | n=432       |
|                             | >50 years             | 0.45 ± 0.28                         | 0.46 ± 0.29 | 0.79 ± 0.34                           | 0.72 ± 0.32 | 0.34 ± 0.25                                   | 0.25 ± 0.21 |
|                             |                       | n=461                               | n=433       | n=409                                 | n=363       | n=409                                         | n=363       |
| Diabetes<br>duration        | <10 years             | 0.41 ± 0.27                         | 0.41 ± 0.28 | 0.80 ± 0.33                           | 0.73 ± 0.32 | 0.38 ± 0.26                                   | 0.29 ± 0.23 |
|                             |                       | n=474                               | n=491       | n=407                                 | n=406       | n=407                                         | n=406       |
|                             | ≥10 years             | 0.55 ± 0.31                         | 0.56 ± 0.31 | 0.87 ± 0.38                           | 0.78 ± 0.32 | 0.32 ± 0.24                                   | 0.22 ± 0.22 |
|                             |                       | n=756                               | n=737       | n=661                                 | n=648       | n=661                                         | n=648       |

Data presented as mean ± SD. BMI, body mass index; mITT, modified intent-to-treat; SD, standard deviation.

**Supplementary Table S2: Baseline characteristics of population included in patient-level meta-analysis of people with Type 2 DM by subgroup, by age at onset of diabetes subgroups (pooled data from EDITION 1, 2 and 3)**

|                                   | Age at onset of diabetes |               |               |               |               |               |
|-----------------------------------|--------------------------|---------------|---------------|---------------|---------------|---------------|
|                                   | <40 years                |               | 40–50 years   |               | >50 years     |               |
|                                   | Gla-300                  | Gla-100       | Gla-300       | Gla-100       | Gla-300       | Gla-100       |
| Age                               | 50.5 ± 9.4               | 49.8 ± 9.3    | 57.9 ± 6.8    | 57.5 ± 6.8    | 65.1 ± 6.0    | 65.7 ± 6.3    |
| Weight, kg                        | 104.7 ± 25.6             | 102.7 ± 23.4  | 101.0 ± 22.2  | 101.1 ± 21.7  | 95.6 ± 20.7   | 96.4 ± 20.1   |
| BMI, kg/m <sup>2</sup>            | 36.0 ± 7.6               | 35.3 ± 6.8    | 35.0 ± 7.0    | 35.3 ± 6.5    | 33.6 ± 6.2    | 33.9 ± 5.9    |
| eGFR*, mL/min/1.73 m <sup>2</sup> | 86.41 ± 22.08            | 85.94 ± 20.54 | 79.61 ± 19.23 | 78.61 ± 21.43 | 73.59 ± 19.09 | 73.89 ± 18.96 |

\*eGFR was calculated using the modification of diet in renal disease formula. Values are mean ± standard deviation unless otherwise stated. BMI, body mass index; eGFR, estimated glomerular filtration rate; Type 2 DM, Type 2 diabetes

**Supplementary Figure S1: Relative risk of experiencing documented symptomatic ( $\leq 3.9$  mmol/L [ $\leq 70$  mg/dL]) hypoglycemia a) during the night (00:00–05:59 h) and b) at any time of day (24 h), over 6 months of treatment by subgroup (% participants with one or more event; safety population; pooled data for EDITION 1, 2 and 3)**

**a)**

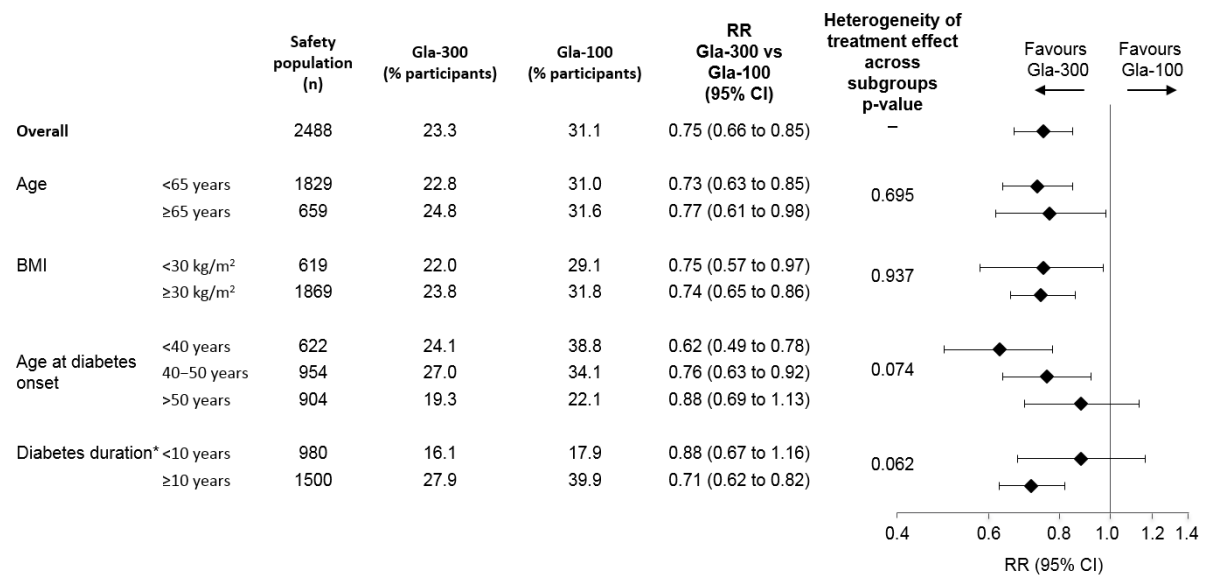

**b)**

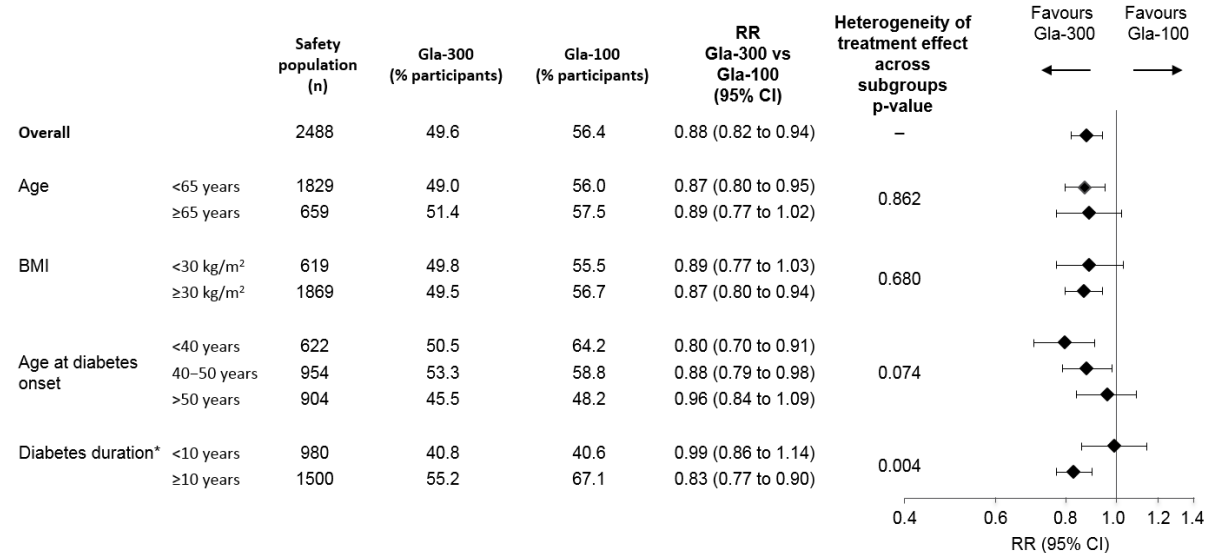

\*Diabetes duration not available for 8 participants. BMI, body mass index; CI confidence interval; RR, relative risk

**Supplementary Figure S2: Annualized rates of documented symptomatic ( $\leq 3.9$  mmol/L [ $\leq 70$  mg/dL]) hypoglycemia a) during the night (00:00–05:59 h) and b) at any time of day (24 h), over 6 months of treatment by subgroup (events per participant-year; safety population)**

**a)**

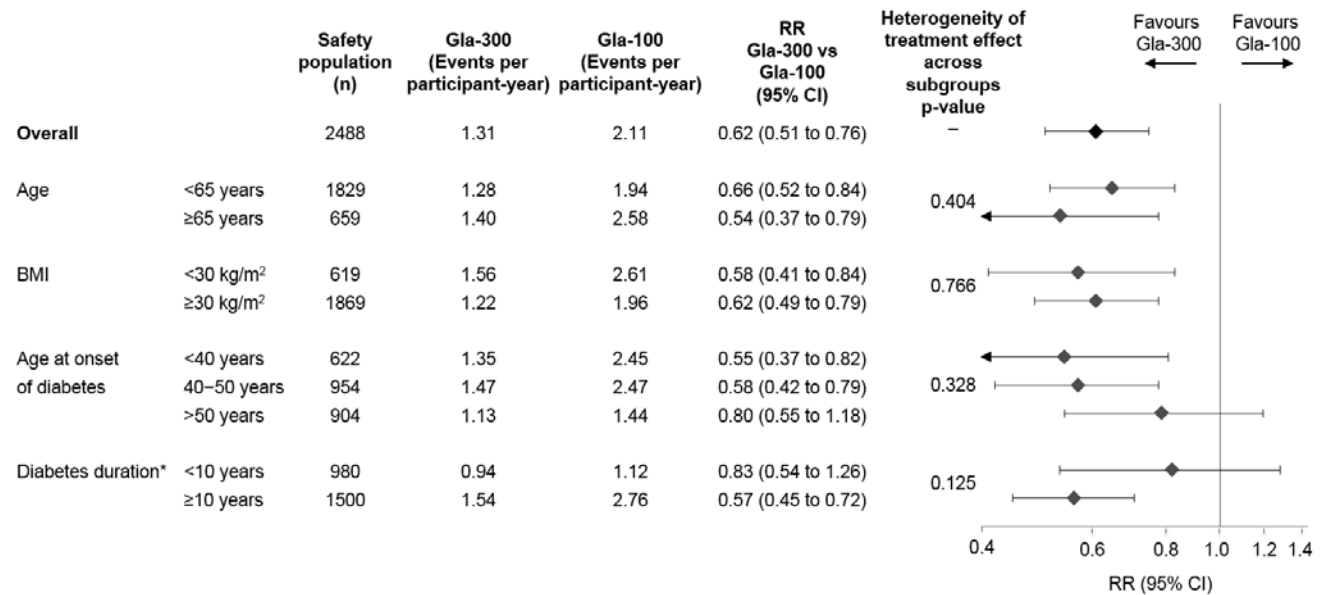

**b)**

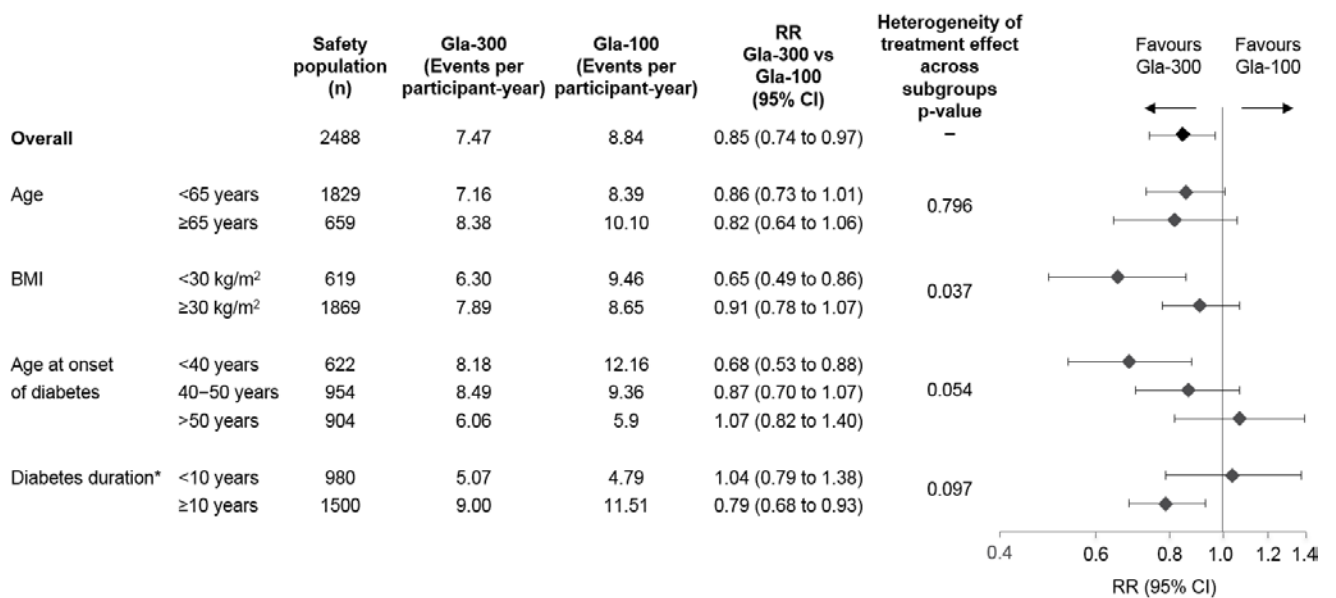

\*Diabetes duration not available for 8 participants. Arrows indicate where the data extend beyond the presented axis limits. BMI, body mass index; CI confidence interval; RR, rate ratio

**Supplementary Figure S3: Relative risk of experiencing severe hypoglycemia at any time of day (24 h), over 6 months of treatment by subgroup (% participants with one or more event; safety population; pooled data for EDITION 1, 2 and 3)**

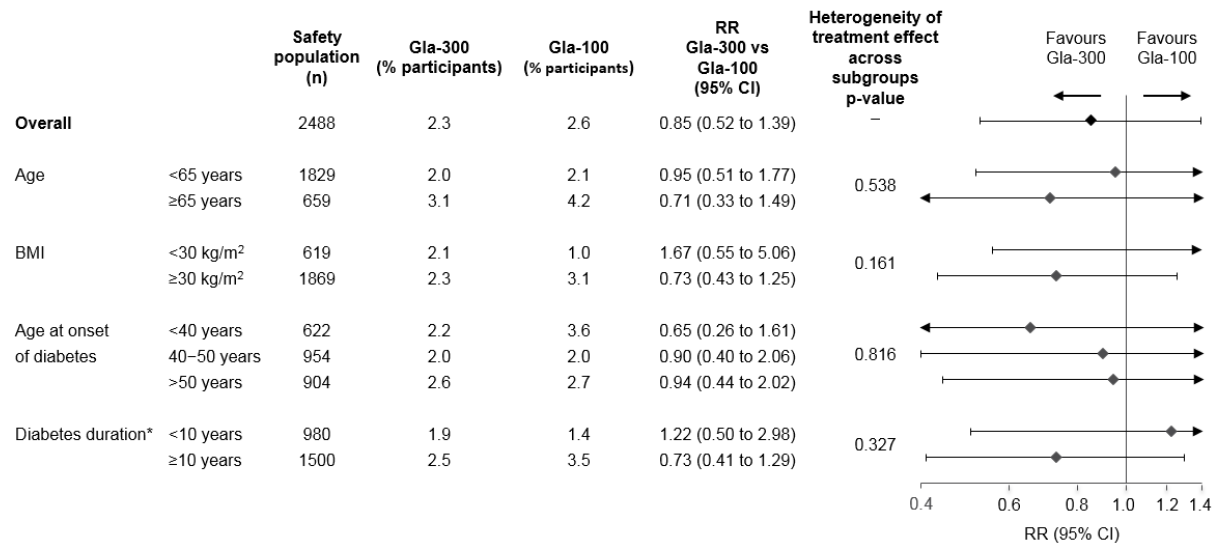

\*Diabetes duration not available for 8 participants. Arrows indicate where data extend beyond the presented axis limits. BMI, body mass index; CI confidence interval; RR, relative risk
